# Supplementary figures and images for: Structural and Functional Annotation of Transposable Elements Revealed a Potential Regulation of Genes Involved in Rubber Biosynthesis by TE-Derived siRNA Interference in Hevea brasiliensis
Source: MDPI journal article supplement (doi:10.3390/ijms21124220), 2020-06-13

*A*

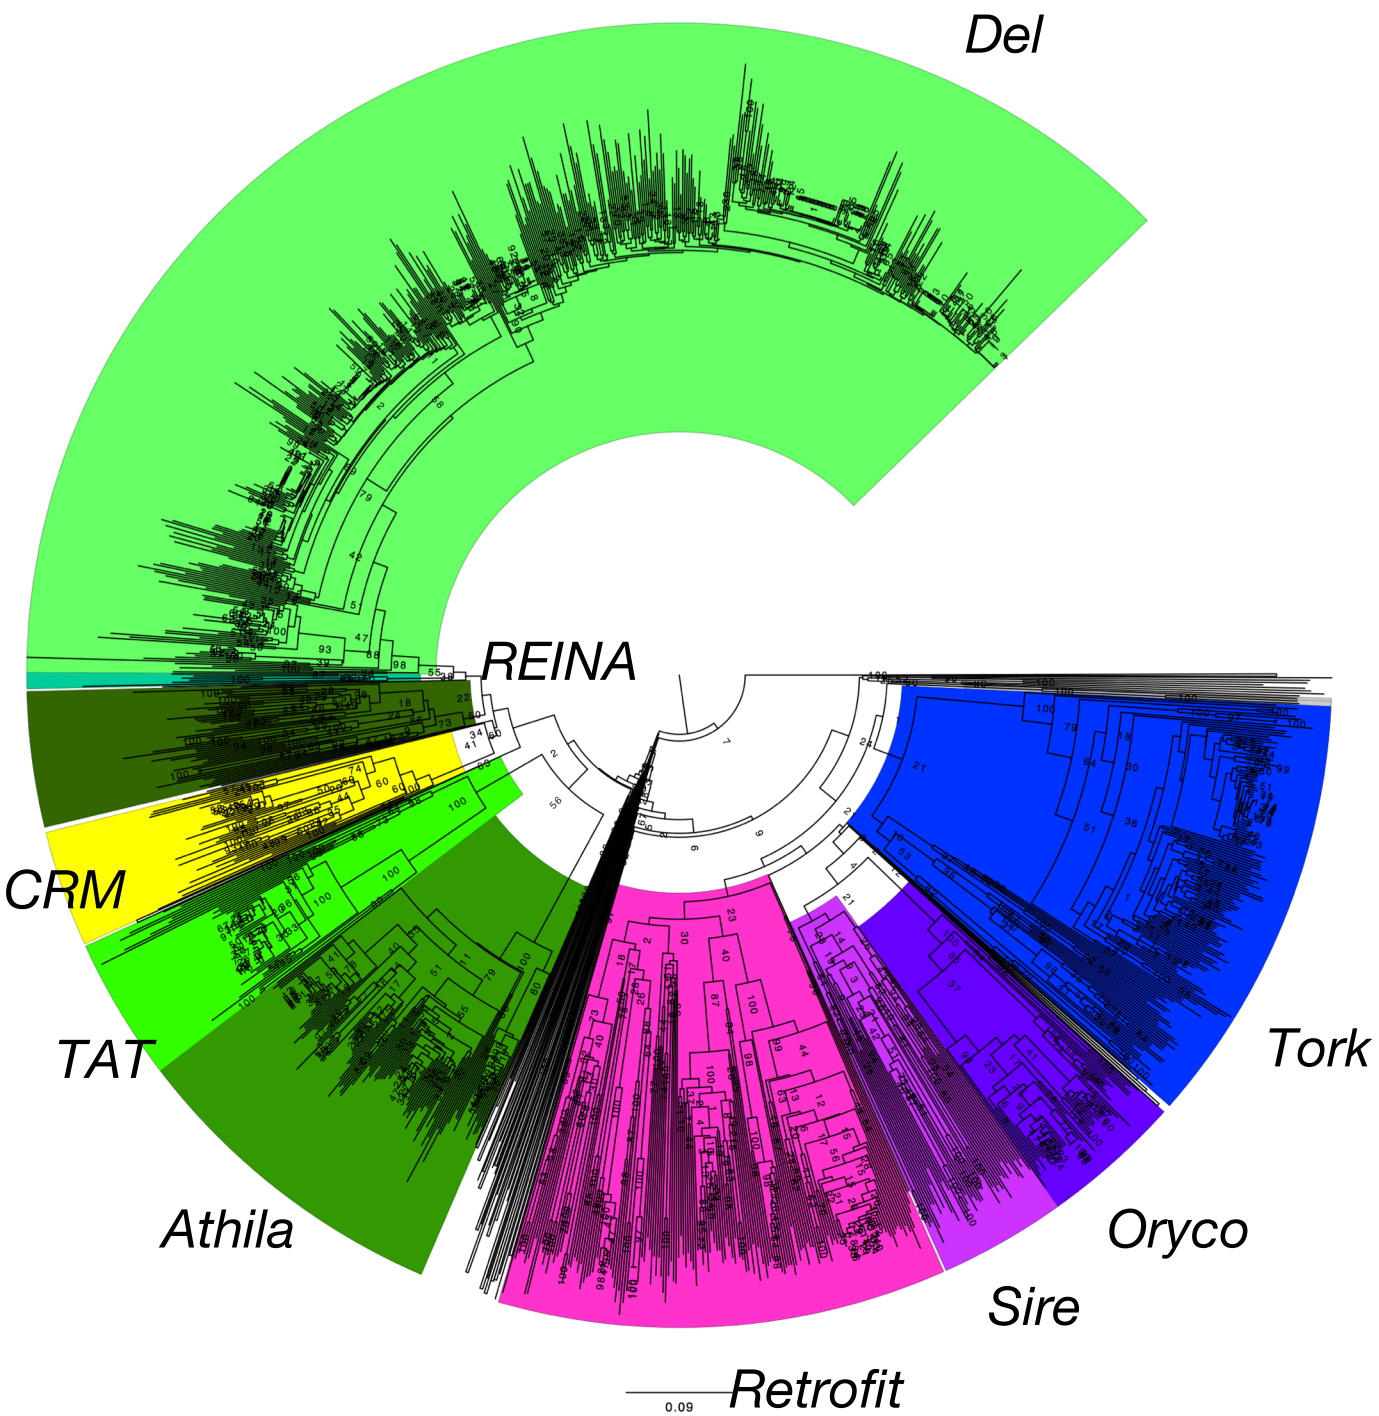

*B*

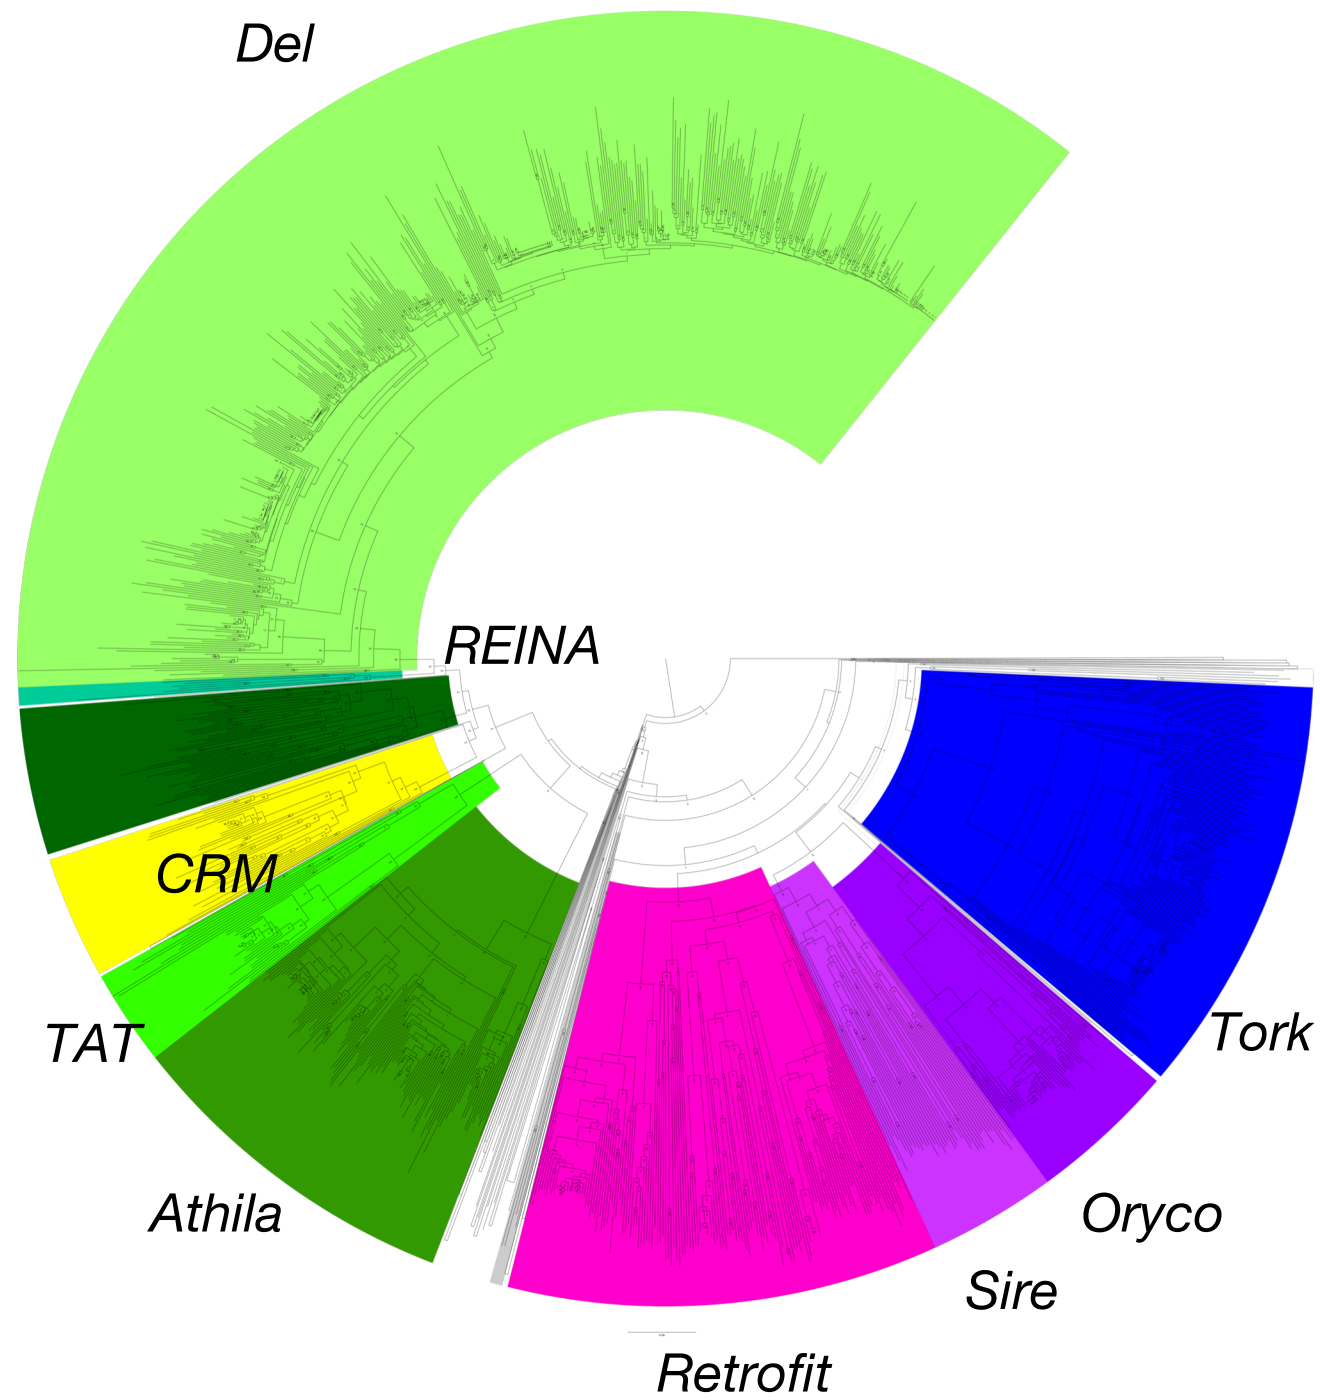

Supplement: s1 [file s1]
